# Supplementary material
Source: Springer Nature journal article supplement (https://www.springermedizin.de/resource/supplementary/13256_2010_1298_MOESM1_ESM.pdf/9647450)

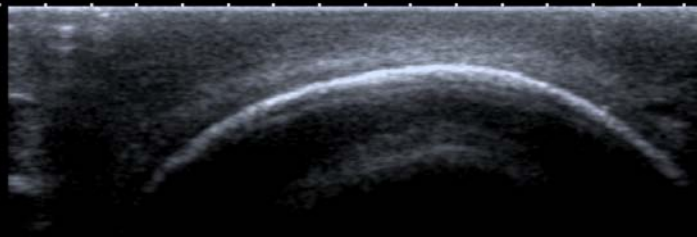

2DG  
100  
DR  
55

0  
1  
2  
3

14L7  
14.0  
16 fps

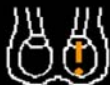

Supplement: MOESM1 [file 9647450]
